# Supplementary material for: Developmental changes in individual alpha frequency: Recording EEG data during public engagement events
Source: PubMed Central journal article supplement — Imaging Neurosci (Camb). 2023 Aug 10;1:imag-1-00001. doi: 10.1162/imag_a_00001 (PMC10503479; doi:10.1162/imag_a_00001), 2023-08-10
Supplement: imag_a_00001-supp.pdf [file imag_a_00001-supp.pdf]

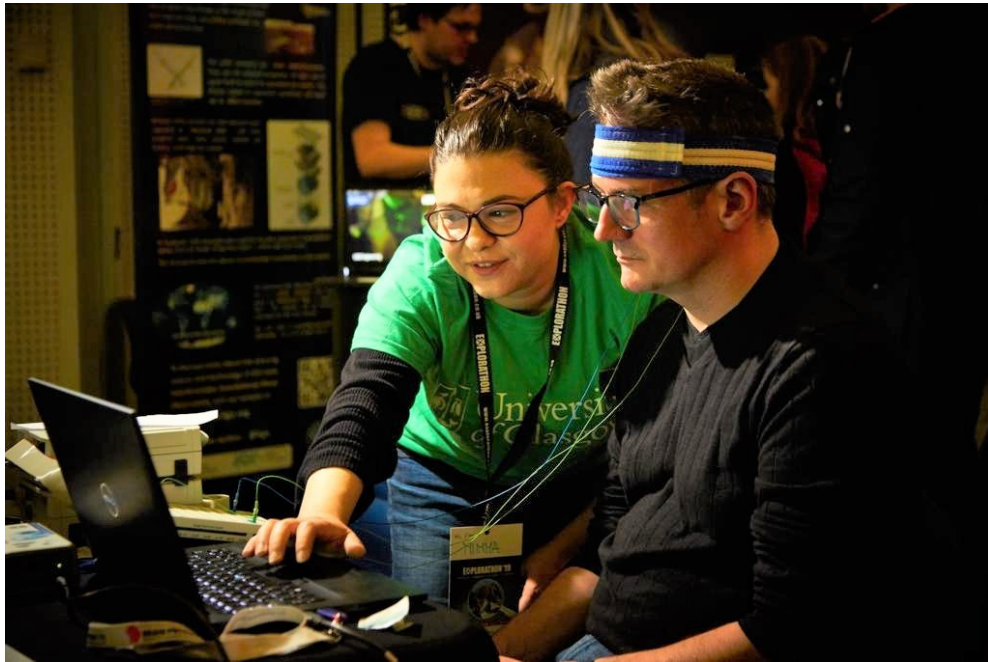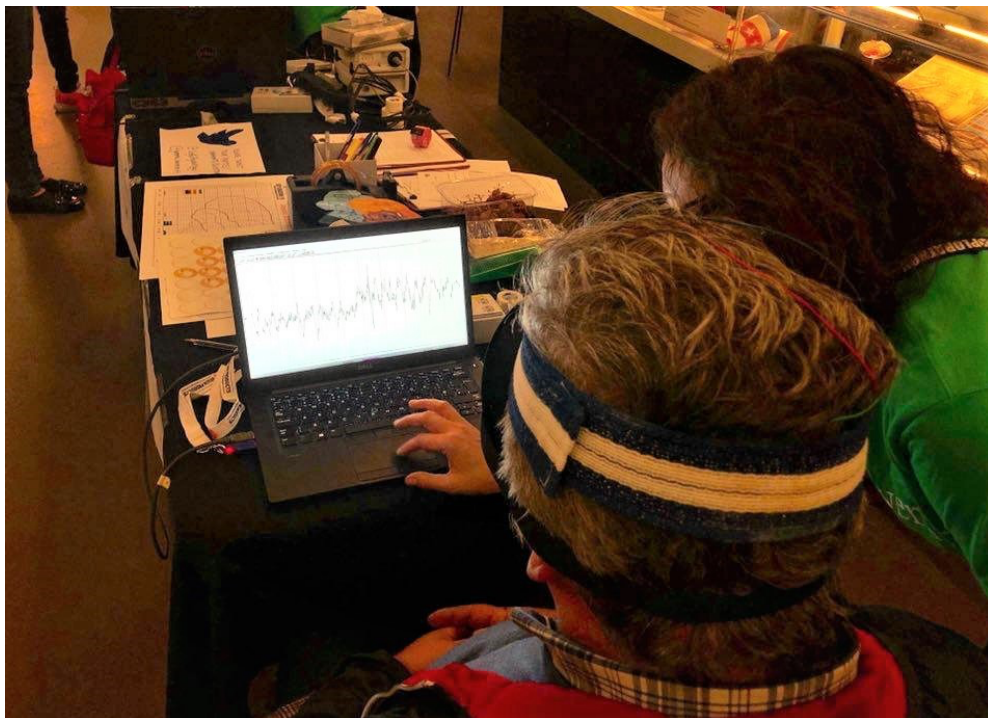

**Supplementary material**

Images of the *Rhythms of the Brain* stall taken during the Explorathon 2019 science festival at the Riverside Museum, Glasgow.

n.b. The subjects of the photograph have provided author GL with written consent to use these images as part of this publication.
